# Supplementary material
Source: publisher figshare collection journal article supplement (https://karger.figshare.com/articles/dataset/_/5126182)
Supplement: Supplementary file 1 [file 1]

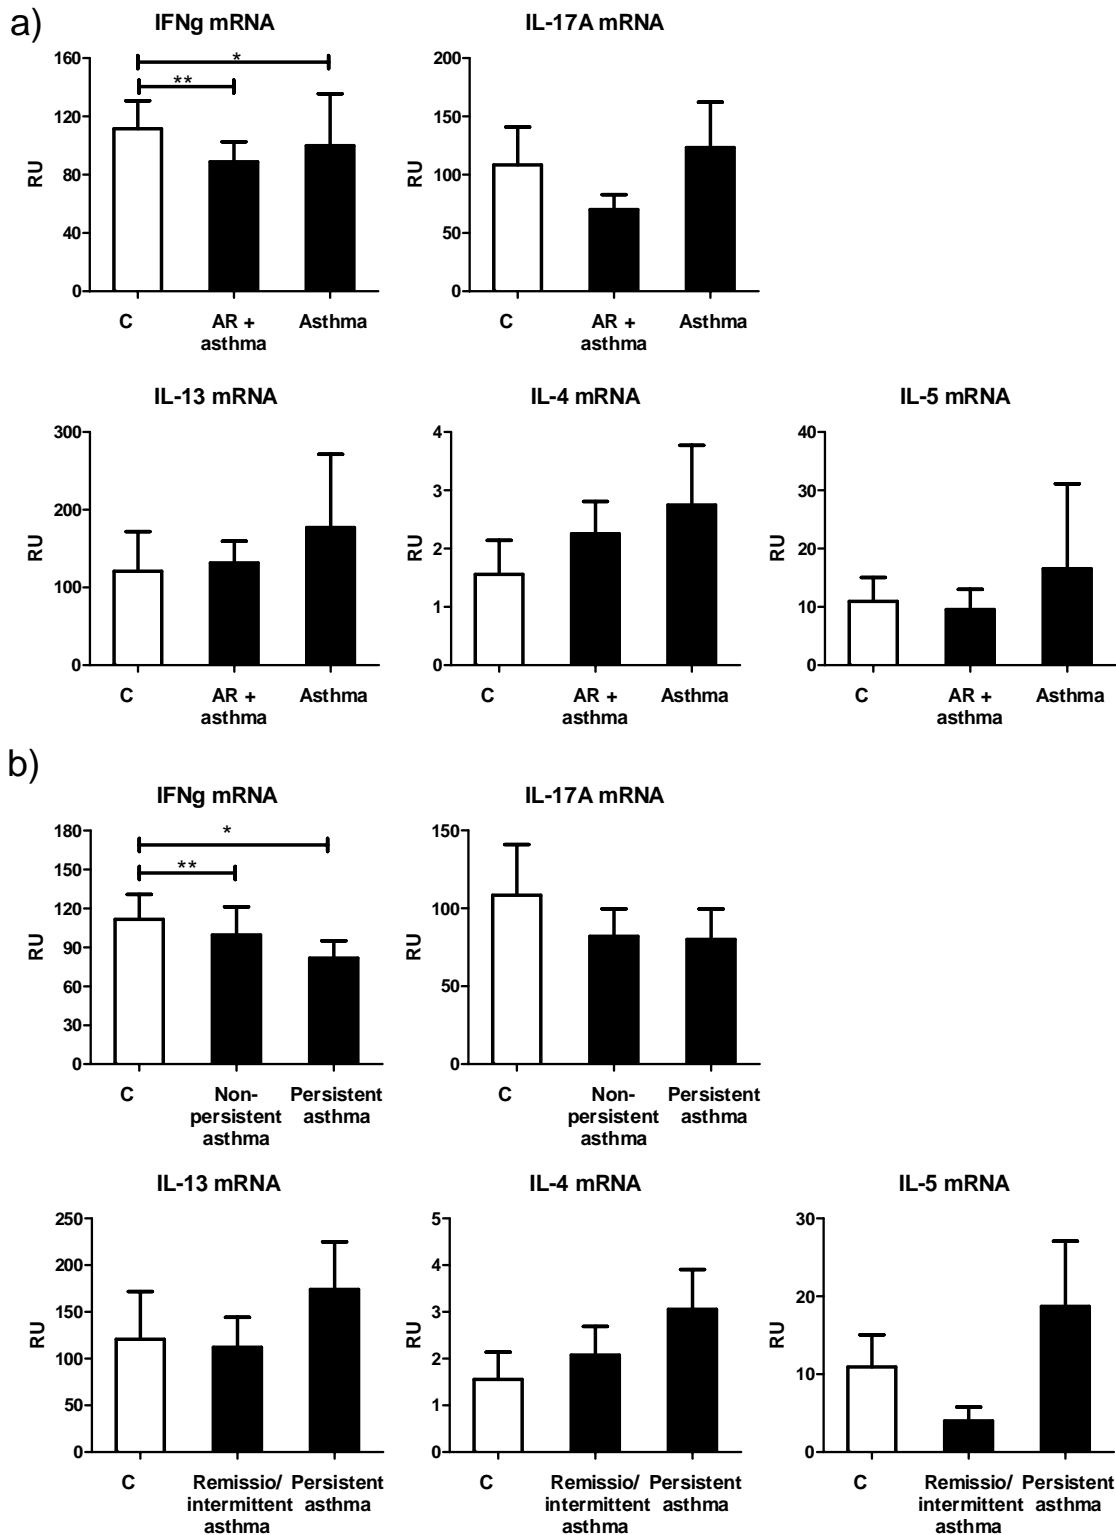

**Figure S2. IFN- $\gamma$  messenger RNA is down-regulated in asthma.** IFN- $\gamma$  messenger RNA (mRNA), IL-17A mRNA, IL-13 mRNA, IL-4 mRNA and IL-5 mRNA levels in a) in controls (C), in subjects with allergic rhinitis and asthma (AR+asthma) and in asthmatics without concomitant allergic rhinitis (Asthma) and in b) controls, in subjects with asthma remission or intermittent asthma (Non-persistent asthma) and in subjects with mild, moderate or severe persistent asthma (Persistent asthma). Results are shown as relative units (RU). The columns and error bars represent means  $\pm$  SEMs. \* $p < 0.05$ ; \*\* $p < 0.01$ .
