# Supplementary material
Source: publisher figshare collection journal article supplement (https://karger.figshare.com/articles/dataset/_/5126182)
Supplement: Supplementary file 2 [file 1]

Table S2

a) Cytokine expression levels in individual asthma severity categories

| Asthma severity categories |                | IL-4 mRNA | IL-5 mRNA | IL-13 mRNA | IL-17A mRNA | IFN- $\gamma$ mRNA |
|----------------------------|----------------|-----------|-----------|------------|-------------|--------------------|
| Remission                  | Mean           | 2,1       | 5,8       | 171,0      | 52,6        | 123,0              |
|                            | Std. Deviation | 3,4       | 15,9      | 402,7      | 60,3        | 150,1              |
| Intermittent               | Mean           | 2,1       | 3,4       | 96,0       | 90,2        | 93,0               |
|                            | Std. Deviation | 5,1       | 12,8      | 188,2      | 150,1       | 172,8              |
| Mild persistent            | Mean           | 1,5       | 14,7      | 102,7      | 41,9        | 119,4              |
|                            | Std. Deviation | 2,1       | 39,8      | 172,8      | 55,3        | 142,7              |
| Moderate persistent        | Mean           | 3,7       | 17,5      | 184,5      | 91,8        | 75,8               |
|                            | Std. Deviation | 7,7       | 48,8      | 301,5      | 135,8       | 92,6               |
| Severe persistent          | Mean           | 2,0       | 25,3      | 219,0      | 95,2        | 59,2               |
|                            | Std. Deviation | 3,1       | 90,0      | 580,7      | 204,1       | 49,2               |
| Control                    | Mean           | 1,6       | 10,9      | 120,8      | 108,5       | 111,5              |
|                            | Std. Deviation | 3,3       | 23,3      | 293,0      | 186,7       | 110,5              |
| Total                      | Mean           | 2,2       | 11,0      | 136,7      | 87,5        | 95,8               |
|                            | Std. Deviation | 4,8       | 39,5      | 309,2      | 151,2       | 133,3              |

b) MicroRNA expressions in individual asthma severity categories

| Asthma severity categories |                | mir-7 | mir-143   | mir-187 | mir-224 | mir-498 | mir-7675p | mir-874 | mir-886-3p | Let-7e   | mir-18a | mir-126  | mir-146a | mir-155 | mir-205 |
|----------------------------|----------------|-------|-----------|---------|---------|---------|-----------|---------|------------|----------|---------|----------|----------|---------|---------|
| Remission                  | Mean           | 487,5 | 1295856,3 | 14591,8 | 6178,4  | 242,5   | 14,3      | 6146,1  | 33444,2    | 638866,3 | 629,4   | 194416,1 | 238606,5 | 21373,7 | 1086,3  |
|                            | Std. Deviation | 297,2 | 891112,6  | 8727,5  | 4179,5  | 125,8   | 40,0      | 2888,9  | 23968,3    | 300449,9 | 487,1   | 87529,8  | 127765,3 | 11594,1 | 800,3   |
| Intermittent               | Mean           | 311,4 | 1021866,6 | 14402,7 | 6820,5  | 328,2   | 3,5       | 5996,0  | 33281,1    | 612005,0 | 644,2   | 167195,4 | 215715,2 | 16998,5 | 1291,8  |
|                            | Std. Deviation | 233,1 | 693511,0  | 11488,9 | 6554,3  | 224,5   | 10,5      | 3111,5  | 23895,7    | 320716,2 | 485,5   | 82089,4  | 136582,7 | 10525,5 | 1132,2  |
| Mild persistent            | Mean           | 372,7 | 1572285,2 | 15524,4 | 8827,9  | 277,8   | 15,0      | 6517,4  | 29932,2    | 777514,4 | 812,2   | 237799,0 | 214001,3 | 23727,5 | 1089,3  |
|                            | Std. Deviation | 194,3 | 891714,3  | 8762,1  | 7304,0  | 272,1   | 29,2      | 1860,2  | 14732,2    | 369032,2 | 622,2   | 112375,2 | 84784,9  | 9965,0  | 774,1   |
| Moderate persistent        | Mean           | 304,0 | 1086527,5 | 13413,4 | 7247,0  | 309,4   | 8,5       | 6455,7  | 39576,8    | 649674,5 | 748,5   | 196512,6 | 224085,2 | 22727,0 | 1195,2  |
|                            | Std. Deviation | 236,0 | 880100,7  | 9102,4  | 4176,7  | 280,1   | 19,7      | 2858,7  | 20655,2    | 353976,2 | 504,7   | 104515,1 | 206329,5 | 22609,4 | 729,3   |
| Severe persistent          | Mean           | 341,4 | 1196227,3 | 21166,8 | 9082,9  | 470,0   | 5,2       | 6860,1  | 50224,9    | 737352,3 | 642,6   | 195429,7 | 230130,2 | 18198,5 | 1455,5  |
|                            | Std. Deviation | 176,4 | 727929,7  | 11621,7 | 7632,1  | 566,7   | 12,7      | 3930,8  | 49402,7    | 632877,1 | 395,1   | 112246,5 | 204165,4 | 8412,0  | 1240,9  |
| Control                    | Mean           | 309,4 | 894812,6  | 9858,8  | 8954,1  | 191,1   | 15,3      | 5426,0  | 26931,2    | 743360,9 | 859,3   | 246445,3 | 255230,0 | 27038,5 | 1310,4  |
|                            | Std. Deviation | 229,6 | 582203,9  | 6211,4  | 6375,6  | 180,2   | 26,4      | 2239,5  | 16244,1    | 263079,8 | 392,6   | 97787,2  | 170200,1 | 15061,1 | 738,6   |
| Total                      | Mean           | 332,8 | 1094159,5 | 14046,6 | 7729,8  | 296,4   | 9,3       | 6094,5  | 34381,0    | 678152,3 | 723,2   | 201739,3 | 229446,5 | 21360,7 | 1260,0  |
|                            | Std. Deviation | 232,0 | 756593,9  | 9983,5  | 6175,2  | 284,4   | 22,4      | 2864,3  | 25625,1    | 360512,9 | 476,0   | 99617,2  | 159919,4 | 14538,0 | 936,6   |
