# Supplementary material
Source: publisher figshare collection journal article supplement (https://karger.figshare.com/articles/dataset/_/5126182)
Supplement: Supplementary file 3 [file 1]

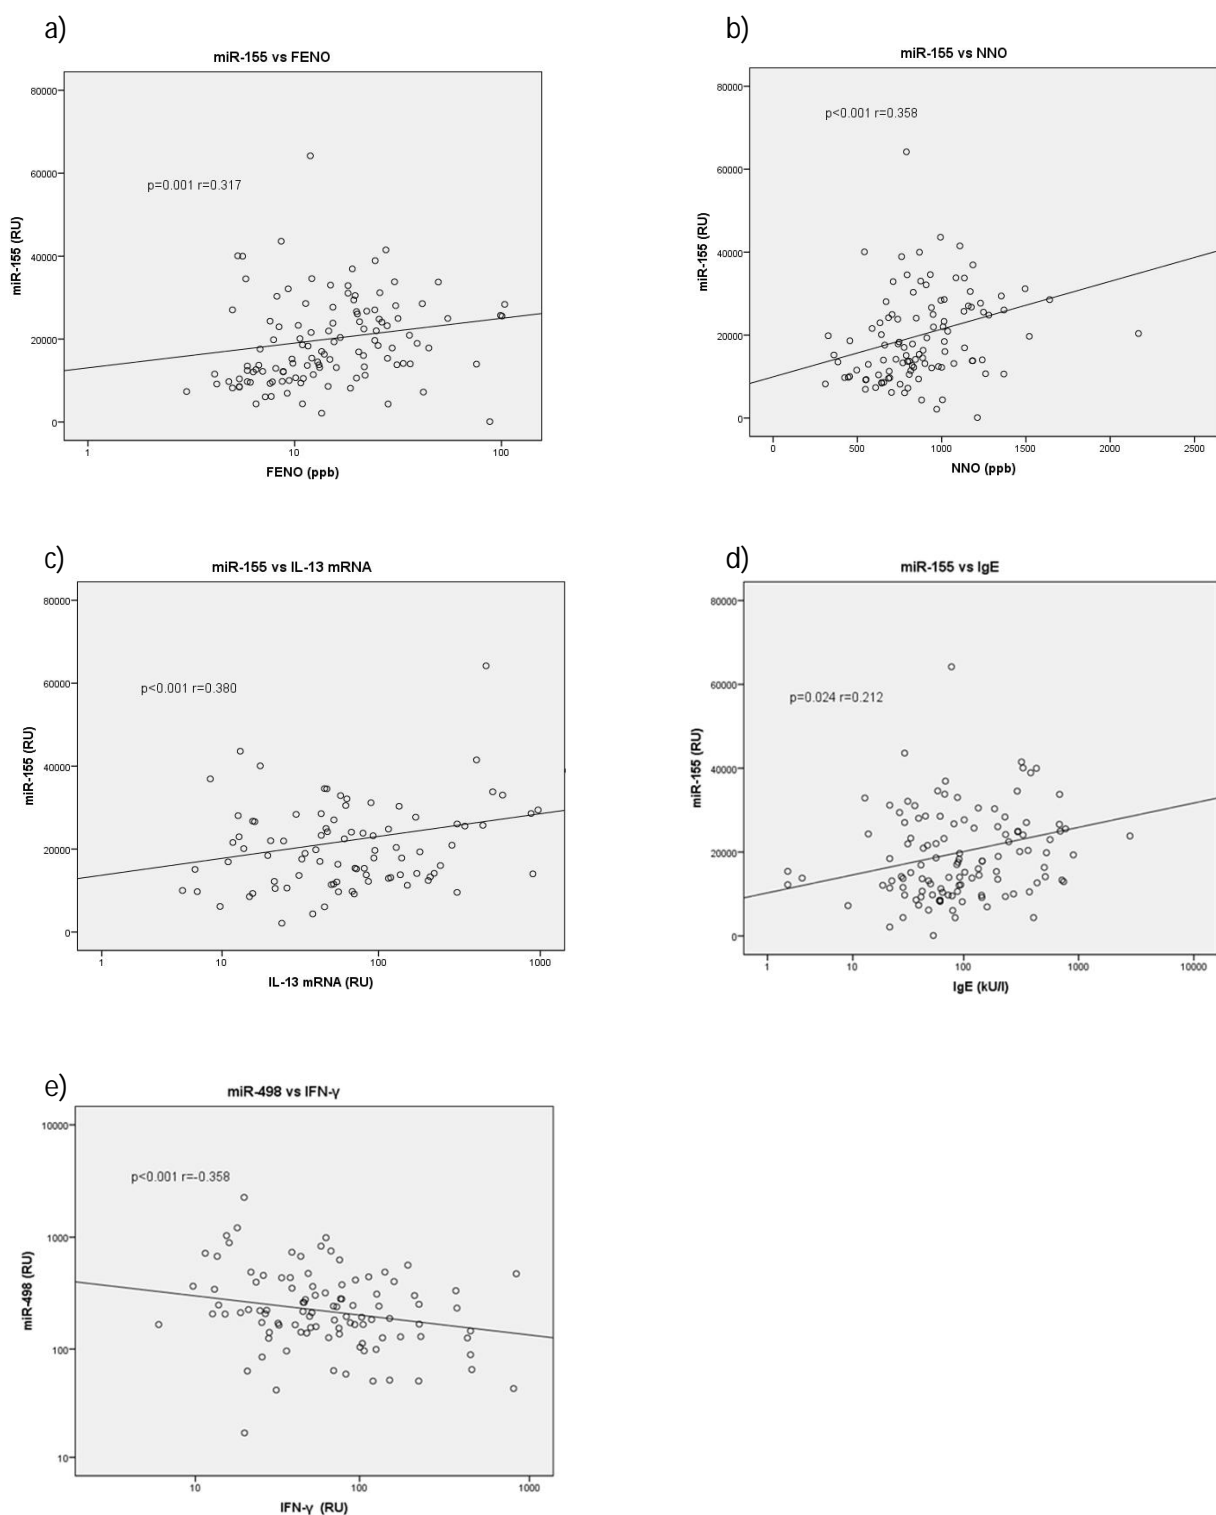

Figure S3. Correlations between a) microRNA (miR) 155 and exhaled nitric oxide (FENO), b) miR-155 and nasal nitric oxide (NNO), c) miR-155 and IL-13 messenger RNA (mRNA), d) miR-155 and total IgE and e) miR-498 and IFN- $\gamma$  in asthmatic subjects.
