# Supplementary material
Source: publisher figshare collection journal article supplement (https://karger.figshare.com/articles/dataset/_/5126182)
Supplement: Supplementary file 4 [file 1]

Archive with 5 entries (5 files):
- 000358486_sm_Figure_1.pdf
- 000358486_sm_Figure_2.pdf
- 000358486_sm_Figure_3.pdf
- 000358486_sm_Table_1.PDF
- 000358486_sm_Table_2.PDF
