# Supplementary material
Source: publisher figshare collection journal article supplement (https://karger.figshare.com/articles/dataset/_/5126182)
Supplement: Supplementary file 4 [file 1 › 000358486_sm_Table_1.PDF]

Table S1a) The differences in the expressions of miR-18a, miR-126, miR-155, miR-498 and miR-187 between control, allergic rhinitis (AR) and asthma and non-allergic rhinitis groups when adjusted with smoking.

|         | p-value between control and AR+ asthma groups adjusted with smoking | p-value between control and asthma groups adjusted with smoking | p-value between AR+ asthma and asthma groups adjusted with smoking |
|---------|---------------------------------------------------------------------|-----------------------------------------------------------------|--------------------------------------------------------------------|
| miR-18a | 0.141                                                               | 0.141                                                           | 0.586                                                              |
| miR-126 | <b>0.010</b>                                                        | <b>0.008</b>                                                    | 0.318                                                              |
| miR-155 | <b>0.049</b>                                                        | 0.102                                                           | 0.654                                                              |
| miR-498 | <b>0.011</b>                                                        | 0.185                                                           | 0.189                                                              |
| miR-187 | <b>0.011</b>                                                        | 0.176                                                           | 0.288                                                              |

Table S1b) The differences in the expressions of miR-18a, miR-126, let 7E, miR-155, miR-224, miR-498 and miR-187, miR-874, miR-143 and miR-88-3p between control, non-persistent and persistent asthma groups when adjusted with smoking.

|            | p-value between control and non-persistent asthma groups adjusted with smoking | p-value between control and persistent asthma groups adjusted with smoking | p-value between non-persistent and persistent asthma groups adjusted with smoking |
|------------|--------------------------------------------------------------------------------|----------------------------------------------------------------------------|-----------------------------------------------------------------------------------|
| miR-18a    | <b>0.047</b>                                                                   | 0.397                                                                      | 0.207                                                                             |
| miR-126    | <b>0.001</b>                                                                   | 0.079                                                                      | 0.063                                                                             |
| Let 7E     | 0.087                                                                          | 0.550                                                                      | 0.198                                                                             |
| miR-155    | <b>0.007</b>                                                                   | 0.249                                                                      | 0.056                                                                             |
| miR-224    | 0.070                                                                          | 0.370                                                                      | 0.300                                                                             |
| miR-498    | <b>0.025</b>                                                                   | <b>0.015</b>                                                               | 0.639                                                                             |
| miR-187    | <b>0.031</b>                                                                   | <b>0.015</b>                                                               | 0.619                                                                             |
| miR-874    | 0.327                                                                          | 0.093                                                                      | 0.347                                                                             |
| miR-143    | 0.242                                                                          | 0.051                                                                      | 0.275                                                                             |
| miR-886-3p | 0.185                                                                          | <b>0.038</b>                                                               | 0.257                                                                             |
