# Supplementary material
Source: publisher figshare collection journal article supplement (https://karger.figshare.com/articles/dataset/_/5126182)

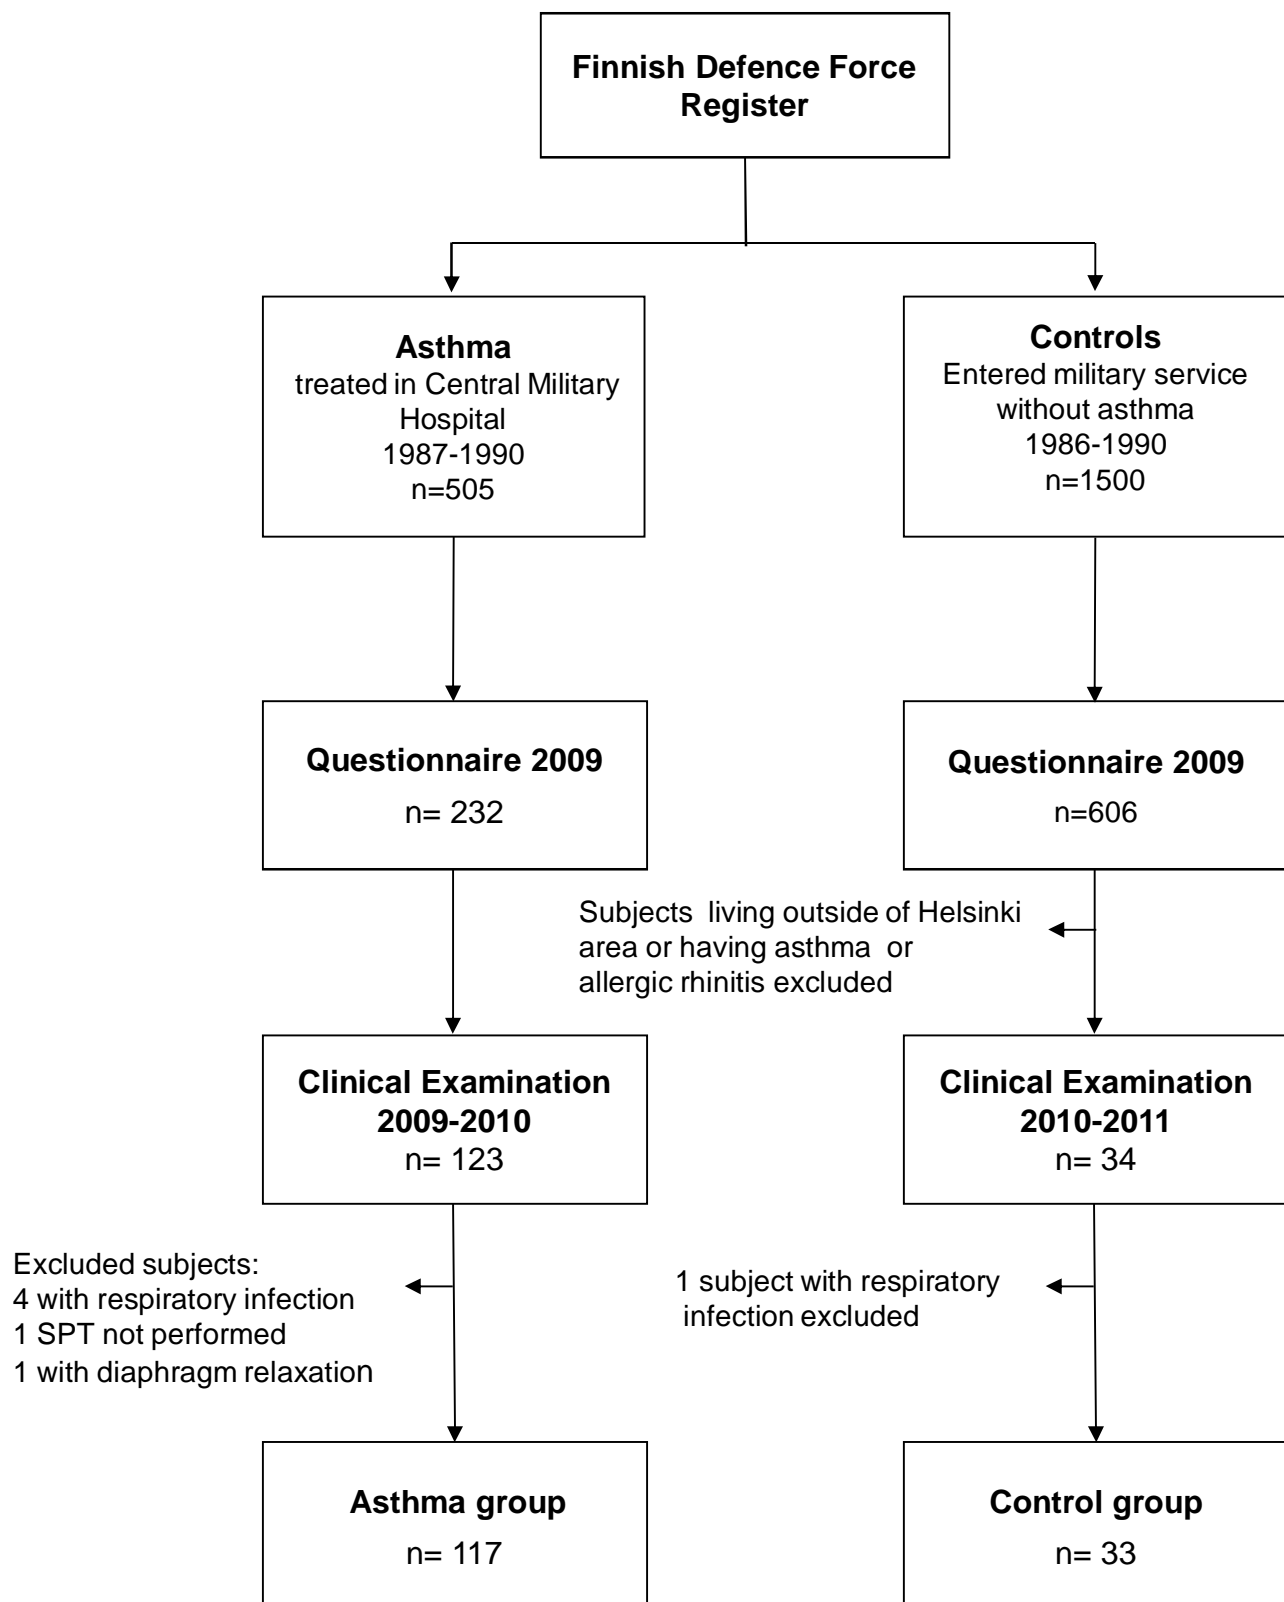

Figure S1. Description of the study population.

Supplement: Supplementary file 4 [file 1 › 000358486_sm_Figure_1.pdf]
